# Supplementary material
Source: PubMed Central journal article supplement (PMC3102179)
Supplement: NIHMS292191-supplement-Supplementary_Information.pdf [file NIHMS292191-supplement-Supplementary_Information.pdf]

## Supplementary Data

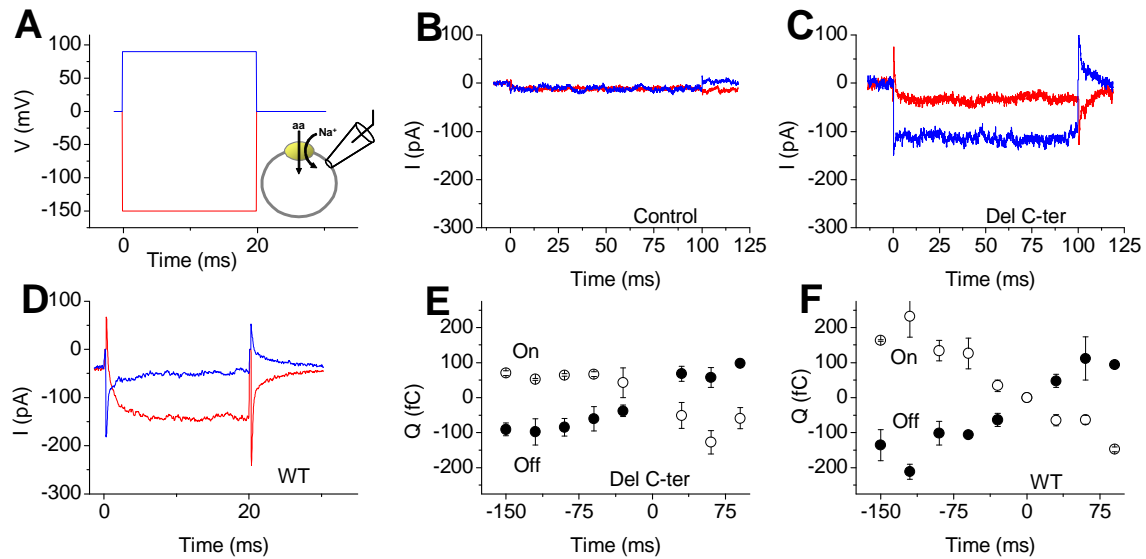

**Supplementary Figure 1:** Voltage jump-induced transient currents are present in SNAT2<sub>Del C-ter</sub>. The voltage jump protocol (A) was used to measure 10 mM alanine-sensitive transport and transient currents of non-transfected cell (B), SNAT2<sub>Del C-ter</sub> (C), and SNAT2<sub>WT</sub> (D) expression cells. The extracellular solution contained 140 mM NaMes and the intracellular solution contained 140 mM KMes. E and F, voltage dependence of the charge moved in the on response and off response in SNAT2<sub>Del C-ter</sub> (E) and SNAT2<sub>WT</sub> (F) expressing cells.

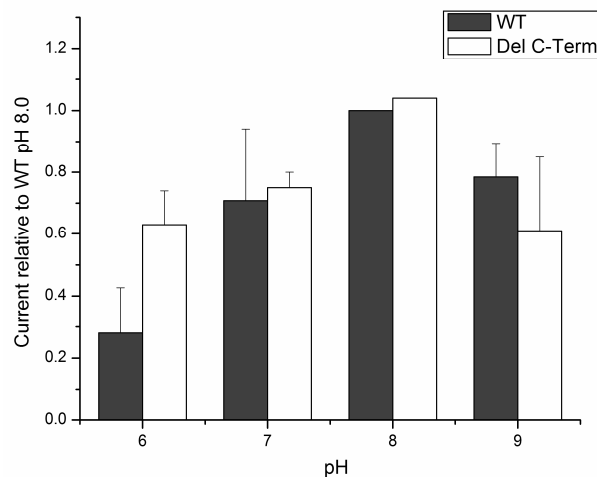

**Supplementary Figure 2:** pH dependence of SNAT2<sub>WT</sub> and SNAT2<sub>Del c-term</sub> expressing cells' inward current response to 200 μl alanine. The external solution contained 140mM NaMes, and the pipette solution contained 140mM KMes at +60mV transmembrane potential. Responses from all cells were normalized to the response of SNAT2<sub>WT</sub> at pH 8.0.

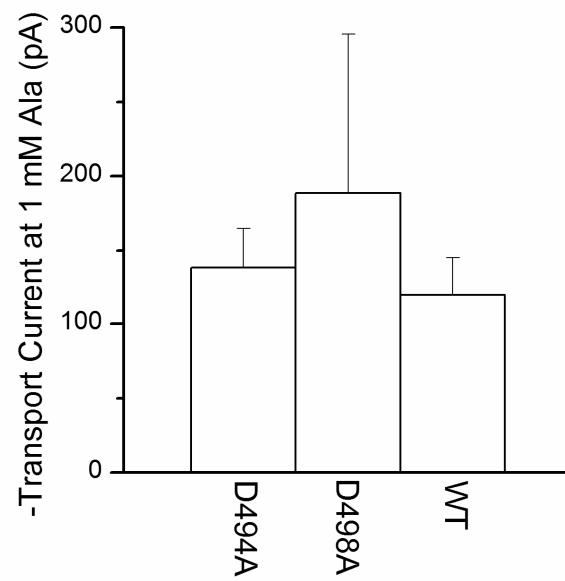

**Supplementary Figure 3:** Comparison of average transport currents elicited by application of 1 mM alanine to wild-type SNAT2, and SNAT2 with D494A and D498A mutations. The transmembrane potential was 0 mV
